# Supplementary material for: Identification of New CTX Analogues in Fish from the Madeira and Selvagens Archipelagos by Neuro-2a CBA and LC-HRMS
Source: MDPI journal article supplement (doi:10.3390/md20040236), 2022-03-29
Supplement: s1 [file s1]

**Table S1.** List of GPS coordinates and depth of capture of individuals captured between October 2013 and December 2014 in the coasts of Madeira Archipelago including Madeira, Desertas and Selvagens Islands included in Table 1.

| Code | Species                     | Location         | GPS coordinates                  | Depth of capture (m) |
|------|-----------------------------|------------------|----------------------------------|----------------------|
| 1    | <i>Mycteroperca fusca</i>   | Desertas Islands | -                                | -                    |
| 2    | <i>Chelon labrosus</i>      | Desertas Islands | -                                | -                    |
| 6    | <i>Bodianus scrofa</i>      | Selvagens Grande | -                                | -                    |
| 13   | <i>Kyphosus sectatrix</i>   | Selvagens Grande | -                                | -                    |
| 14   | <i>Balistes caprisus</i>    | Selvagens Grande | -                                | -                    |
| 25   | <i>Gymnothorax unicolor</i> | Selvagens Grande | -                                | -                    |
| 26   | <i>G. unicolor</i>          | Selvagens Grande | -                                | -                    |
| 27   | <i>G. unicolor</i>          | Selvagens Grande | -                                | -                    |
| 28   | <i>G. unicolor</i>          | Selvagens Grande | -                                | -                    |
| 29   | <i>C. labrosus</i>          | Desertas Islands | -                                | -                    |
| 31   | <i>Sparisoma</i> sp.        | Desertas Islands | -                                | -                    |
| 34   | <i>Muraena augusti</i>      | Desertas Grande  | 32°31'05,07" N<br>16°30'49,50" W | 6                    |
| 35   | <i>M. augusti</i>           | Desertas Grande  | 32°30'57,30" N<br>16°30'47,60" W | 6                    |
| 36   | <i>Muraena helena</i>       | Desertas Grande  | 32°31'05,07" N<br>16°30'49,50" W | 6                    |
| 37   | <i>M. helena</i>            | Desertas Grande  | 32°31'05,07" N<br>16°30'49,50" W | 6                    |
| 38   | <i>M. helena</i>            | Desertas Grande  | 32°30'57,30" N<br>16°30'47,60" W | 6                    |
| 39   | <i>M. helena</i>            | Desertas Grande  | 32°30'57,30" N<br>16°30'47,60" W | 6                    |

**Table S2.** Identification criteria using full scan LC-HRMS analysis in ESI + mode for C-CTX1.

| Sample ID | C-CTX1 (M, C <sub>62</sub> H <sub>92</sub> O <sub>19</sub> , MW 1140.6227) |                      |                                                                            |                     |      |             |
|-----------|----------------------------------------------------------------------------|----------------------|----------------------------------------------------------------------------|---------------------|------|-------------|
|           | Matrix                                                                     | Retention time (min) | [C-CTX1+H] <sup>+</sup> (C <sub>62</sub> H <sub>93</sub> O <sub>19</sub> ) |                     |      |             |
|           |                                                                            |                      | Theoretical values                                                         |                     |      |             |
|           |                                                                            |                      | m/z                                                                        |                     | RDBE | Ratio M+1/M |
|           |                                                                            |                      | 1141.6305                                                                  |                     | 16.5 | 0.67        |
|           |                                                                            |                      | Experimental-data                                                          |                     |      |             |
|           |                                                                            |                      | m/z                                                                        | Mass accuracy (ppm) | RDBE | Ratio M+1/M |
| 25        | Liver                                                                      | 7.59                 | 1141.6329                                                                  | 2.0                 | 16.5 | 0.55        |
| 26        | Muscle                                                                     | -                    | -                                                                          | -                   | -    | -           |
| 26        | Liver                                                                      | 7.60                 | 1141.6319                                                                  | 1.2                 | 16.5 | 0.60        |
| 27        | Muscle                                                                     | -                    | -                                                                          | -                   | -    | -           |
| 27        | Liver                                                                      | 7.52                 | 1141.6350                                                                  | 3.9                 | 16.5 | 0.69        |
| 35        | Liver                                                                      | 7.65                 | 1141.6334                                                                  | 2.5                 | 16.5 | 0.68        |

**Table S3.** Identification criteria using full scan LC-HRMS analysis in ESI<sup>+</sup> mode for putative analogue dihydro-CTX2.

| Sample ID | Dihydro-CTX2 (M, C <sub>60</sub> H <sub>84</sub> O <sub>18</sub> , MW 1092.5652) |                      |                                                                                |     |      |             |
|-----------|----------------------------------------------------------------------------------|----------------------|--------------------------------------------------------------------------------|-----|------|-------------|
|           | Matrix                                                                           | Retention time (min) | [CTX2-2H+Na] <sup>+</sup> (C <sub>60</sub> H <sub>84</sub> O <sub>18</sub> Na) |     |      |             |
|           |                                                                                  |                      | Theoretical values                                                             |     |      |             |
|           |                                                                                  |                      | m/z                                                                            |     | RDBE | Ratio M+1/M |
|           |                                                                                  |                      | 1115.5611                                                                      |     | 18.5 | 0.67        |
|           |                                                                                  |                      | Experimental-data                                                              |     |      |             |
| m/z       | Mass accuracy (ppm)                                                              | RDBE                 | Ratio M+1/M                                                                    |     |      |             |
| 25        | Liver                                                                            | -                    | -                                                                              | -   | -    | -           |
| 26        | Muscle                                                                           | 6.65                 | 1115.5609                                                                      | 5.3 | 18.5 | 0.58        |
| 26        | Liver                                                                            | 6.70                 | 1115.5619                                                                      | 6.2 | 18.5 | 0.64        |
| 27        | Muscle                                                                           | 6.63                 | 1115.5614                                                                      | 5.7 | 18.5 | 0.65        |
| 27        | Liver                                                                            | -                    | -                                                                              | -   | -    | -           |
| 35        | Liver                                                                            | 6.51                 | 1115.5610                                                                      | 5.4 | 18.5 | 0.63        |

**Table S4.** Identification criteria using full scan LC-HRMS analysis in ESI<sup>+</sup> mode for gambieric acid A.

| Sample ID | Gambieric acid A (M, C <sub>59</sub> H <sub>92</sub> O <sub>16</sub> , MW 1056.6379) |                      |                                                                                      |                     |      |             |                                                                                                      |                     |      |                                                                                        |           |                     |      |             |
|-----------|--------------------------------------------------------------------------------------|----------------------|--------------------------------------------------------------------------------------|---------------------|------|-------------|------------------------------------------------------------------------------------------------------|---------------------|------|----------------------------------------------------------------------------------------|-----------|---------------------|------|-------------|
|           | Matrix                                                                               | Retention time (min) | [Gambieric acid A+H] <sup>+</sup> (C <sub>59</sub> H <sub>93</sub> O <sub>16</sub> ) |                     |      |             | [Gambieric acid A+NH <sub>4</sub> ] <sup>+</sup> (C <sub>59</sub> H <sub>96</sub> O <sub>16</sub> N) |                     |      | Gambieric acid A+Na] <sup>+</sup> (C <sub>59</sub> H <sub>92</sub> O <sub>16</sub> Na) |           |                     |      |             |
|           |                                                                                      |                      | Theoretical values                                                                   |                     |      |             |                                                                                                      |                     |      |                                                                                        |           |                     |      |             |
|           |                                                                                      |                      | m/z                                                                                  |                     | RDBE | Ratio M+1/M | m/z                                                                                                  |                     | RDBE | Ratio M+1/M                                                                            | m/z       |                     | RDBE | Ratio M+1/M |
|           |                                                                                      |                      | 1057.6458                                                                            |                     | 13.5 | 0.64        | 1074.6726                                                                                            |                     | 12.5 | 0.64                                                                                   | 1079.6278 |                     | 13.5 | 0.64        |
|           |                                                                                      |                      | Experimental-data                                                                    |                     |      |             |                                                                                                      |                     |      |                                                                                        |           |                     |      |             |
|           |                                                                                      |                      | m/z                                                                                  | Mass accuracy (ppm) | RDBE | Ratio M+1/M | m/z                                                                                                  | Mass accuracy (ppm) | RDBE | Ratio M+1/M                                                                            | m/z       | Mass accuracy (ppm) | RDBE | Ratio M+1/M |
| 25        | Liver                                                                                | -                    | -                                                                                    | -                   | -    | -           | -                                                                                                    | -                   | -    | -                                                                                      | -         | -                   | -    |             |
| 26        | Muscle                                                                               | -                    | -                                                                                    | -                   | -    | -           | -                                                                                                    | -                   | -    | -                                                                                      | -         | -                   | -    |             |
| 26        | Liver                                                                                | -                    | -                                                                                    | -                   | -    | -           | -                                                                                                    | -                   | -    | -                                                                                      | -         | -                   | -    |             |
| 27        | Muscle                                                                               | 3.86                 | 1057.6495                                                                            | 3.5                 | 13.5 | 0.59        | 1074.6749                                                                                            | 2.4                 | 12.5 | 0.79                                                                                   | 1079.6328 | 4.7                 | 13.5 | 0.61        |
| 27        | Liver                                                                                | -                    | -                                                                                    | -                   | -    | -           | -                                                                                                    | -                   | -    | -                                                                                      | -         | -                   | -    | -           |
| 35        | Liver                                                                                | 4.00                 | 1057.6458                                                                            | 0.1                 | 13.5 | 0.59        | 1074.6722                                                                                            | 0.2                 | 12.5 | 0.51                                                                                   | 1079.6282 | 0.4                 | 13.5 | 0.60        |

**Table S5.** Identification criteria using full scan LC-HRMS analysis in ESI<sup>+</sup> mode for putative CTX analogue (C-CTX-1109).

| Sample ID | Putative CTX analogue (C-CTX-1109) |                      |                                                            |                     |             |                                              |                     |             |
|-----------|------------------------------------|----------------------|------------------------------------------------------------|---------------------|-------------|----------------------------------------------|---------------------|-------------|
|           | Matrix                             | Retention time (min) | [CTX analogue+NH <sub>4</sub> ] <sup>+</sup> m/z 1127.6023 |                     |             | [CTX analogue+Na] <sup>+</sup> m/z 1132.5577 |                     |             |
|           |                                    |                      | Theoretical values                                         |                     |             |                                              |                     |             |
|           |                                    |                      | m/z                                                        |                     | Ratio M+1/M | m/z                                          |                     | Ratio M+1/M |
|           |                                    |                      | 1127.6023                                                  |                     | 0.64        | 1132.5577                                    |                     | 0.64        |
|           |                                    |                      | Experimental-data                                          |                     |             |                                              |                     |             |
|           |                                    |                      | m/z                                                        | Mass accuracy (ppm) | Ratio M+1/M | m/z                                          | Mass accuracy (ppm) | Ratio M+1/M |
| 25        | Liver                              | 7.14                 | 1127.6099                                                  | 6.7                 | 0.63        | 1132.5645                                    | 6.0                 | 0.53        |
| 26        | Muscle                             | 7.03                 | 1127.6092                                                  | 6.1                 | 0.57        | 1132.5639                                    | 5.5                 | 0.55        |
| 26        | Liver                              | 7.07                 | 1127.6082                                                  | 5.2                 | 0.57        | 1132.5625                                    | 4.2                 | 0.66        |
| 27        | Muscle                             | 7.02                 | 1127.6087                                                  | 5.6                 | 0.55        | -                                            | -                   | -           |
| 27        | Liver                              | 7.06                 | 1127.6119                                                  | 8.5                 | 0.53        | 1132.5603                                    | 2.3                 | 0.58        |
| 35        | Liver                              | 6.87                 | 1127.6098                                                  | 6.6                 | 0.53        | 1132.5572                                    | 0.5                 | 0.58        |
